# Supplementary material for: HOTAIR as a Prognostic Predictor for Diverse Human Cancers: A Meta- and Bioinformatics Analysis
Source: PubMed Central journal article supplement (PMC6628152; doi:10.3390/cancers11060778), 2019-06-05
Supplement: cancers-11-00778-s001.pdf [file cancers-11-00778-s001.pdf]

# HOTAIR as a Prognostic Predictor for Diverse Human Cancers: A Meta- and Bioinformatics Analysis

Halil Ibrahim Toy, Didem Okmen, Panagiota I. Kontou, Alexandros G. Georgakilas and Athanasia Pavlopoulou

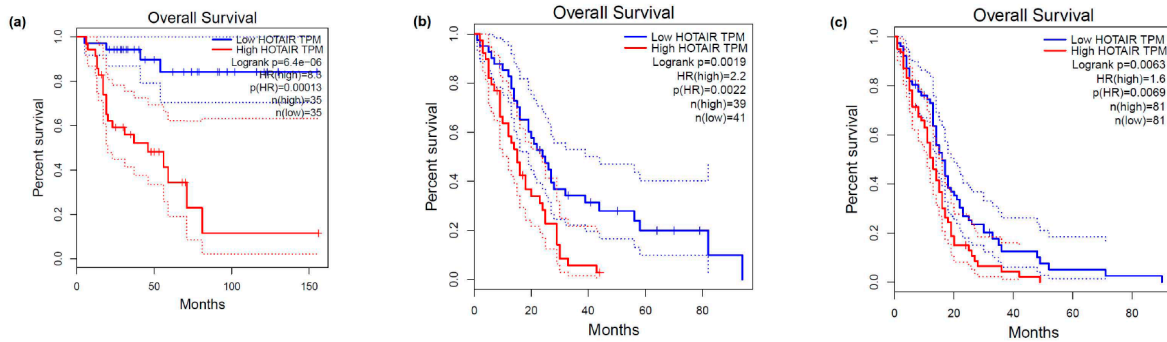

**Figure S1.** Kaplan–Meier plots depicting the prognostic potential of *HOTAIR* for OS in various types of cancers. (a) ACC; (b) MESO and (c) GBM. The corresponding HRs and *p*-values are indicated. The CIs are denoted by dashed lines.

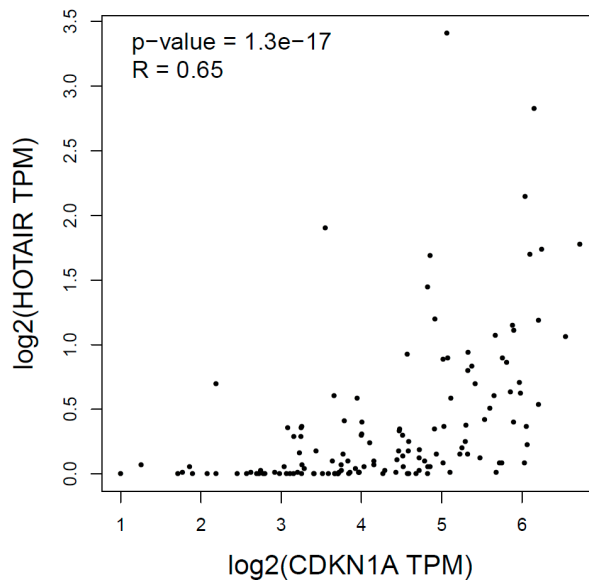

**Figure S2.** Correlation between *HOTAIR* and *CDKN1A* expression.

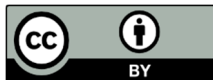

© 2019 by the authors. Licensee MDPI, Basel, Switzerland. This article is an open access article distributed under the terms and conditions of the Creative Commons Attribution (CC BY) license (<http://creativecommons.org/licenses/by/4.0/>).
